# Supplementary material for: A Case-Control Study on Intimate Partner Violence during Pregnancy and Low Birth Weight, Southeast Ethiopia
Source: Hindawi journal article supplement (doi:10.1155/2015/394875), 2015-01-01
Supplement: f1 [file 394875.f1.pdf]

## 1. Annexes

### Annex I- Structured Questionnaire in English

#### Inclusion criteria

1. Being term baby
2. Mothers have no history of diabetes mellitus

#### Anthropometric measurement

| Variable        | Measurement   | Remark |
|-----------------|---------------|--------|
| Gestational age | /_____/ Weeks |        |
| Neonatal weight | /_____/Grams  |        |
| Maternal weight | /_____/Kg     |        |
| Maternal height | /_____/Meters |        |

#### Part I: Socio-Economic Variables

| No  | Questions          | Response Options                                                                        | Skip |
|-----|--------------------|-----------------------------------------------------------------------------------------|------|
| 101 | Head of house hold | 1. Male<br>2. Female                                                                    |      |
| 102 | Marital status     | 1. Married<br>2. Divorced<br>3. Separated<br>4. Single<br>5. Widowed                    |      |
| 103 | Religion           | 1. Orthodox<br>2. Protestant<br>3. Muslim<br>4. Catholic<br>9. Others (specify) /_____/ |      |

|     |                                                                                 |                                                                                                                                         |  |
|-----|---------------------------------------------------------------------------------|-----------------------------------------------------------------------------------------------------------------------------------------|--|
| 104 | Ethnicity                                                                       | 1. Amhara<br>2. Tigrie<br>3. Oromo<br>4. Guragie<br>9. Others (specify) _____                                                           |  |
| 105 | Residential area                                                                | 1. Urban<br>2. Rural                                                                                                                    |  |
| 106 | Total family size of the house hold                                             | Write in number / _____/                                                                                                                |  |
| 107 | Total number of < 5 children                                                    | Write in number / _____/                                                                                                                |  |
| 108 | Have you attended formal education?                                             | 1. Yes<br>2. No                                                                                                                         |  |
| 109 | If <b>yes</b> to <b>Q108</b> , what is your highest grade completed?            | Grade _____                                                                                                                             |  |
| 110 | If <b>No</b> to <b>Q108</b> , are you able to read and write?                   | 1. Yes<br>2. No                                                                                                                         |  |
| 111 | Educational status of the husband                                               | 1. Illiterate<br>2. Read & write only<br>3. Highest grade completed _____                                                               |  |
| 112 | Maternal occupational status<br><br><i>(more than one response is possible)</i> | 1. Housewife<br>2. Farmer<br>3. Private employee<br>4. Merchant<br>5. Daily laborer<br>6. Gov't employee<br>9. Other (specify) / _____/ |  |
| 113 | Occupational status of the husband<br><br>(more than one response is possible)  | 1. Farmer<br>2. Merchant<br>3. Private employee                                                                                         |  |

|     |                                                  |                                                                                                                                |  |
|-----|--------------------------------------------------|--------------------------------------------------------------------------------------------------------------------------------|--|
|     |                                                  | 4. Daily laborer<br>5. Gov't employee<br>9. Other (specify) / _____/                                                           |  |
| 114 | Monthly income of the family                     | _____<br>birr/month<br>_____<br>birr/year                                                                                      |  |
| 115 | Who decides how the money you earn will be used? | 1. Respondent alone<br>2. Respondent and husband/partner jointly<br>3. Husband/partner alone<br>4. Someone else(specify _____) |  |

## Part II: Maternal Characteristics

|     |                                                                 |                                                                                                                                                      |   |
|-----|-----------------------------------------------------------------|------------------------------------------------------------------------------------------------------------------------------------------------------|---|
| 116 | Mother's age in years                                           | Year completed / _____/                                                                                                                              |   |
| 117 | Age at first birth                                              | / ____/ Years                                                                                                                                        |   |
| 118 | Age when the youngest child was born                            | / ____/ Years                                                                                                                                        |   |
| 119 | Total number of pregnancy                                       | / _____/ in number                                                                                                                                   |   |
| 120 | Total number of live births?                                    | / _____/ in number                                                                                                                                   |   |
| 121 | Have you visited health facility for ANC for current pregnancy? | 1. Yes<br>2. No                                                                                                                                      | ► |
| 122 | At what months of the current pregnancy you started ANC?        | 1. At _____ months<br>2. Don't know/not sure                                                                                                         |   |
| 123 | How many times you visited health facility for ANC?             | / _____/ times                                                                                                                                       |   |
| 124 | Where did you attend the ANC during your pregnancy?             | 1. Health post<br>2. Health center<br>3. Gov't hospital<br>4. Private hospital<br>5. Private clinic<br>6. NGOs clinic<br>9. Others(specify) / _____/ |   |

|     |                                                                                                      |                                                                                                                                                   |  |
|-----|------------------------------------------------------------------------------------------------------|---------------------------------------------------------------------------------------------------------------------------------------------------|--|
| 125 | During your ANC visit(s), are you informed about signs of pregnancy complications?                   | 1. Yes<br>2. No                                                                                                                                   |  |
| 126 | If <b>yes</b> for <b>Q125</b> , which complications? ( <i>more than one response is possible</i> )   | 1. Vaginal bleeding<br>2. Vaginal gush of fluid.<br>3. Severe headache<br>4. Blurred vision<br>5. Fever<br>6. Abdominal pain<br>9. Other / _____/ |  |
|     | Have encountered any of the mentioned complications?                                                 | 1. Yes<br>2. No                                                                                                                                   |  |
|     | If <b>yes</b> for <b>Q-----</b> , which complications? ( <i>more than one response is possible</i> ) | 1. Vaginal bleeding<br>2. Vaginal gush of fluid.<br>3. Severe headache<br>4. Blurred vision<br>5. Fever<br>6. Abdominal pain<br>9. Other / _____/ |  |
| 127 | Have you taken any deworming drugs during your pregnancy?                                            | 1. Yes<br>2. No<br>3. Do not know/not sure                                                                                                        |  |
| 128 | Is there any history of abortion?                                                                    | 1. Yes<br>2. No                                                                                                                                   |  |
| 129 | If <b>yes</b> for <b>Q128</b> , how many times?                                                      | / _____/times                                                                                                                                     |  |
| 130 | If <b>yes</b> for <b>Q128</b> , which type of abortion was it?                                       | 1. Spontaneous abortion<br>2. Induced abortion                                                                                                    |  |
| 130 | If <b>yes</b> for <b>Q128</b> , by whom the abortion was conducted?                                  | 1. Myself/relatives/friend<br>2. TBA<br>3. TTBA<br>4. Health workers                                                                              |  |
| 131 | Have you ever chewed Khat?                                                                           | 1. Yes<br>2. No                                                                                                                                   |  |
| 132 | If <b>yes</b> for <b>Q131</b> , have you chewed khat in the                                          | 1. Yes<br>2. No                                                                                                                                   |  |

|     |                                                                        |                                                                                                    |  |
|-----|------------------------------------------------------------------------|----------------------------------------------------------------------------------------------------|--|
|     | last 12 months?                                                        |                                                                                                    |  |
| 133 | If <b>yes for Q132</b> , how frequent have chewed khat?                | _____/ day<br>_____/ week<br>_____/month                                                           |  |
| 134 | Have you ever smoked cigarette                                         | 1. Yes<br>2. No                                                                                    |  |
| 135 | If <b>yes for Q134</b> , have you smoked in the last 12 months?        | 1. Yes<br>2. No                                                                                    |  |
| 136 | If <b>yes for Q135</b> , How many cigarettes have smoked per day?      | _____/day                                                                                          |  |
| 137 | Have ever drunk alcohol?                                               | 1. Yes<br>2. No                                                                                    |  |
| 138 | If <b>yes for Q137</b> , have you drunk alcohol in the last 12 months? | 1. Yes<br>2. No                                                                                    |  |
| 139 | Which type?<br><br>( <i>More than one answer is possible.</i> )        | 1. Tela<br>2. Tej<br>3. Areqe<br>4. Beer/draft<br>5. Wine<br>6. Whisky<br>7. Others (specify)_____ |  |

### Part III: Violence /Abuse

- 131 Have you had a relationship over the past 12 months? 1. Yes  
2. No
- 132 How many years have you been in this relationship /\_\_\_\_\_/ months(*only for <1 year*)  
/\_\_\_\_\_/ years
- 133 Are you currently in a relationship? 1. Yes  
2. No
- 134 Were /are you happy in your relationship? 1. Yes  
2. No
- 135 If the relationship ends, How many /\_\_\_\_\_/ months months has it been since ended?
- 136 Was your relationship ended with your 1. Yes  
2. No

agreement?

- 137 Over the last 12 months have you been verbally abused or insulted on the street, on public transport or in other public areas by your partner?
1. Yes
  2. No
  3. Do not remember
- 138 If **yes** to **Q# 137**, how many times? /\_\_\_\_\_/times
- 139 Over the past 12 months has your partner threatened you with a weapon, a dangerous object (knife, bat ...) or has tried to kill you or strangle you?
1. Yes
  2. No
  3. Do not remember
- 140 If **yes** to **Q# 139**, how many times? /\_\_\_\_\_/times
- 141 Over the last 12 months, has your partner forced you to undergo sexual touching, or having sexual contact against your will?
1. Yes
  2. No
  3. Do not remember
- 142 If **yes** to **Q# 131**, how many times? /\_\_\_\_\_/times

**Thinking about your partner or last partner, would you say that over the last 12 months, he**

- 143 Has tried to limit the contact you have with your friend(s) or family members?
1. Yes
  2. No
  3. Does not know
- 144 If **yes** to **Q# 143**, how many times? /\_\_\_\_\_/times
- 145 Has sworn at you, criticized, ridiculed you for what you were doing or saying?
1. Yes
  2. No
- 146 If **yes** to **Q# 145**, how many times? /\_\_\_\_\_/times
- 147 Has stopped talking to you, totally refused to discuss things with you?
1. Yes
  2. No
  3. Do not remember
- 148 If **yes** to **Q# 147**, how many times? /\_\_\_\_\_/times
- 149 Thrown something at you, shaken you or grabbed you suddenly?
1. Yes
  2. No
  3. Do not remember
- 150 If **yes** to **Q# 149**, how many times? /\_\_\_\_\_/times

- 151 Scratched you, pinched you, bitten you or pulled your hair?      1. Yes  
2. No  
3. Do not remember
- 152 If **yes** to **Q# 151**, how many times?      /\_\_\_\_\_/times
- 153 Slapped you, punched or kicked you, hit you with something that hurt you?      1. Yes  
2. No  
3. Do not remember
- 154 If **yes** to **Q# 153**, how many times?      /\_\_\_\_\_/times
- 155 Prevented from entering your home, locked you up, locked you out, or when in the car, left you by the roadside?      1. Yes  
2. No  
3. Do not remember
- 156 If **yes** to **Q# 155**, how many times?      /\_\_\_\_\_/times

**Part IV: Environmental Health Conditions**

|     |                                                                                           |                                                                                                                                                                                                                                                  |  |
|-----|-------------------------------------------------------------------------------------------|--------------------------------------------------------------------------------------------------------------------------------------------------------------------------------------------------------------------------------------------------|--|
| 401 | What is your main source of drinking water?                                               | 1. Piped in to dwelling<br>2. Public tap<br>3. Rain water<br>4. Protected spring<br>5. Protected well<br>6. Unprotected spring<br>7. Unprotected well<br>8. River/stream<br>9. Tube well/borehole with hand pump<br>10. Other (specify) / _____/ |  |
| 402 | Average household water use per day per person for drinking, cooking and personal hygiene | _____in liters                                                                                                                                                                                                                                   |  |
| 403 | Average time taken to and from the nearest water point (including waiting time)           | 1. /_____/ In minutes<br>2. Don't know                                                                                                                                                                                                           |  |
| 404 | What is the method of water storage in the household?                                     | 1. Covered containers<br>2. Open containers<br>3. Constricted neck/end<br>9. Others (specify) /_____/                                                                                                                                            |  |

|     |                                                                                                                 |                                                                                                                                                                                                                                                      |  |
|-----|-----------------------------------------------------------------------------------------------------------------|------------------------------------------------------------------------------------------------------------------------------------------------------------------------------------------------------------------------------------------------------|--|
| 405 | How could you draw water from the storage?                                                                      | 1. Pouring<br>2. Deeping<br>9. Others (specify) /_____/                                                                                                                                                                                              |  |
| 406 | Do you treat water in any way to make it safer?                                                                 | 1. Yes<br>1. No                                                                                                                                                                                                                                      |  |
| 407 | If <b>yes</b> to <b>Q# 406</b> , what activities do you practiced?                                              | 1. Boiling<br>2. Chemical treatments<br>3. Filtering using cloth<br>4. filtering using sand, gravel or ceramics<br>5. Sun radiation treatment<br>6. Sedimentation<br>9. Others (specify) /_____/                                                     |  |
| 408 | Have you got education by health workers on how you can make water safe for drinking?                           | 1. Yes<br>2. No<br>1. Not known/not sure                                                                                                                                                                                                             |  |
| 409 | Have you got advice from health workers about the advantages of washing hands by means of soap or ash?          | 1. Yes<br>2. No<br>9. Others (specify) /_____/                                                                                                                                                                                                       |  |
| 410 | Do you have latrine?                                                                                            | 1. Yes<br>2. No                                                                                                                                                                                                                                      |  |
| 411 | If <b>yes</b> to <b>Q# 410</b> , type of latrine the households use?                                            | 1. Private traditional pit latrine<br>2. Private wooden slab latrine<br>3. Private cement slab latrine<br>4. Private VIP latrine<br>5. Shared wooden slab latrine<br>6. Shared VIP latrine<br>7. Flush to sewerage system<br>9 Other (Specify) _____ |  |
| 412 | If <b>No</b> to <b>Q# 410</b> , where does the family defecate?                                                 | 1. At the back yard<br>2. Open field<br>9. Others (specify) /_____/                                                                                                                                                                                  |  |
| 413 | What happens to the stools of young children (0-3 years) when they do not use the latrine or toilet facilities? | 1. Throw in to toilet/latrine<br>2. Throw outside the yard<br>3. Buried in the yard<br>4. Not disposed or left on the ground<br>9 Other(specify) /_____/                                                                                             |  |



|     |                                                                                              |                                                                                                                                                                           |  |
|-----|----------------------------------------------------------------------------------------------|---------------------------------------------------------------------------------------------------------------------------------------------------------------------------|--|
| 414 | Mainly, how do the household dispose solid wastes?                                           | 1. In a private pit<br>2. Common pit<br>3. Composting<br>4. Burring<br>5. Burning<br>6. Open field disposal<br>7. By other organized agents<br>9 Other (specify) / _____/ |  |
| 415 | Mainly, when do you wash your hands? ( <i>More than one answer is possible</i> )             | 1. After visiting the latrine<br>2. Before preparing the food<br>3. Before serving food<br>4. After eating<br>5. After cleaning child faeces<br>9. Other(Specify) _____   |  |
| 416 | How do you wash your hand?                                                                   | 1. Using water only<br>2. Using soap and water<br>3. Using ash with water<br>9. Others(specify) _____                                                                     |  |
| 417 | How many rooms for use by the member of your household? ( <i>Exclude kitchen and store</i> ) | _____in number                                                                                                                                                            |  |
| 418 | Presence of windows                                                                          | 1. Yes opened<br>2. Yes but not opened<br>3. No window/s<br>9. Other (specify)_____                                                                                       |  |
| 419 | Do you have separate room which is used as Kitchen?                                          | 1. Yes<br>2. No                                                                                                                                                           |  |
| 420 | If you have livestock, do you have separate room for them?                                   | 1. Yes<br>2. No                                                                                                                                                           |  |
| 421 | What type of fuel do you mainly use for cooking?                                             | 1. Wood<br>2. Kerosene<br>3. Electricity<br>4. Animal dung<br>9. Other(specify) _____                                                                                     |  |

አነስተኛ ክብደት ያላቸው ህፃናትን በሚወልዱ እናቶች ላይ ለሚደረግ ጥናት የመረጃ መሰብሰቢያ ቅፅ

- የእርግዝና ጊዜያቸው ከ 37 ሳምንት በላይ የሆናቸው ህፃናት (Term Babies)
- የስኳር ህመም የሌለባቸው እናቶች (Non Diabetic Mothers)

|             |               |      |
|-------------|---------------|------|
| የሚለካው አይነት  | ልኬት           | ምርመራ |
| የእርግዝናንዜ    | / _____ / ወራት |      |
| የህጻኑ/ንዋኩብደት | / _____ / ግራም |      |
| የእናትዮዋ ክብደት | / _____ / ኪ.ግ |      |
| የእናትዮዋ ቁመት  | / _____ / ሜትር |      |

| ተ ቁ | ጥያቄዎች                                       | የተሰጡ መልሶች                                                              |
|-----|---------------------------------------------|------------------------------------------------------------------------|
| 101 | የምትኖረበትን ቤት የሚያስተዳድረዉ                       | 3. ወንድ 2.ሴት                                                            |
| 102 | የጋብቻ ሁኔታ                                    | 6. ያገባች<br>7. የተፋታች<br>8. ተለያይተዉ የሚኖሩ<br>9. ያላገባች<br>10. የሞተባት         |
| 103 | ሃይማኖትሽ ምንድነዉ?                               | 1. ሙ ስሊም<br>2. ኦርቶዶክስ<br>3. ፕሮቴስታንት<br>4. ካቶሊክ<br>9. ሌላ(ይገለፅ) / _____/ |
| 104 | ብሄርሽ ምንድን ነዉ?                               | 5. ኦሮሞ<br>6. አማራ<br>7. ትግሬ<br>8. ጉራጌ<br>9. ሌላ (ይገለፅ) / _____/          |
| 105 | የመኖሪያ ቦታ                                    | 3. ከተማ 2.ገጠር                                                           |
| 106 | የቤተሰብ አባላት ቁጥር                              | በቁጥር ይጻፍ / _____/                                                      |
| 107 | ከአምስት ዓመት በታች (<5) የሆኑ ልጆች ቁጥር              | በቁጥር ይጻፍ / _____/                                                      |
| 108 | መደበኛ ትምህርት ተከታትለሻል?                         | 1. አዎ 2. አልተከታተልኩም                                                     |
| 109 | ለጥ.ቁ 108 መልስ አዎ ከሆነ፣የጠናቀቅሽዉ ክፍል             | _____ ኛ ክፍል                                                            |
| 110 | ለጥ.ቁ 108 መልስ አልተከታተልኩም ከሆነ፣ማንበብና መፃፍ ትችያለሽ? | 1. አዎ 2.አልችልም                                                          |
| 111 | የባለቤትሽ የትምህርት ደረጃስንት ነዉ?                    | 1. ያልተማረ<br>2. መፃፍ እና ማንበብ ብቻ የሚችል<br>3. ያጠናቀቀዉ ክፍል/ _____/            |
|     |                                             | 1. የቤት እመቤት                                                            |

|     |                                           |                                                                                         |
|-----|-------------------------------------------|-----------------------------------------------------------------------------------------|
| 112 | ስራሽ ምንድን ነው? / ከአንድ በላይ መልስ ይቻላል/         | 2. ግብርና<br>3. የግል ተቀጣሪ<br>4. ንግድ<br>5. የቀን ስራ<br>6. የመንግስት ተቀጣሪ<br>9. ሌላ(ይገለፅ) / _____/ |
| 113 | የባለቤትሽ ስራ ምንድን ነው? / ከአንድ በላይ መልስ ይቻላል/   | 1. ግብርና<br>2. ንግድ<br>3. የመንግስት ተቀጣሪ<br>4. የግል ተቀጣሪ<br>5. የቀን ስራ<br>9. ሌላ(ይገለፅ) / _____/ |
| 114 | ወርሃዊ ገቢያችሁ ስንት ይሆናል?                      | 1. _____ብር/ ወር<br>2. _____ብር/ አመት                                                       |
| 115 | ወርሃዊ ገቢያችሁን እንዴት መጠቀም እንዳለባችሁ የሚወስነው ማነው? | 5. እኔ ብቻ<br>6. ባለቤቴና እኔ በጋራ<br>7. ባለቤቴ ብቻ<br>9. ሌላ/ይገለፅ / _____/                        |

### ክፍል ሁለት : የእናትዮዋን ሁኔታ በተመለከተ

|     |                                                                     |                                                                                                                                |
|-----|---------------------------------------------------------------------|--------------------------------------------------------------------------------------------------------------------------------|
| 201 | እድሜ በአመት                                                            | ያጠናቀቀችሁ አመት ይጻፍ / _____/                                                                                                       |
| 202 | ይህ የተወለደው/ችው ህፃን የመጀመሪያሽ ነው/ች?                                      | 1. አዎ <del>ጥቅ. 207 ይለፉ</del><br>2. አይደለም                                                                                       |
| 203 | የመጀመሪያ ልጅሽን የወለድሽው በስንት አመትሽ ነበር?                                   | / _____/ አመቱ                                                                                                                   |
| 204 | ከዚህ በፊት የወለድሽውን ልጅ ስትወልድ ስንት አመትሽ ነበር?                              | / _____/ አመቱ                                                                                                                   |
| 205 | እስከ አሁን ድረስ ስንት ጊዜ አርግዘሻል?                                          | / _____/ በቁጥር ይጻፍ                                                                                                              |
| 206 | አጠቃላይ በህይወት የተወለዱ ልጆች ብዛት ስንት ነው?                                   | / _____/ በቁጥር ይጻፍ                                                                                                              |
| 207 | ይህን/ችን ህጻን ከማረገዝሽ በፊት(በ12 ወራት ውስጥ) ከብደትሽ ስንት ነበር?                   | 1. / _____/ ኪ.ግ<br>2. አላስታውሰዋል                                                                                                 |
| 208 | ለዚህኛው እርግዝና የቅድመ ወሊድ ክትትል ታደርጊ ነበር?                                 | 1. አዎ<br>2. አልተከታተልኩም <del>ጥቅ. 214 ይለፉ</del>                                                                                   |
| 209 | በስንተኛው ወር ላይ መከታተል ጀመርሽ?                                            | 1. በ _____ኛው ወር ላይ<br>2. አላስታውሰዋል                                                                                              |
| 210 | ለቅድመ ወሊድ ክትትል ለምን ያህል ጊዜ ወደ ጤና ተቋም ሄድሽ?                             | / _____/ ጊዜ                                                                                                                    |
| 211 | የቅድመ ወሊድ ክትትል ያደረግሽው የት ነበር?                                        | 7. ጤና ኬላ<br>8. ጤና ጣቢያ<br>9. ከመንግስት ሆስፒታል<br>10. ከግል ሆስፒታል<br>11. ከግል ክሊኒክ<br>12. መንግስታዊ ካልሆነ ድርጅት ክሊኒክ<br>10. ሌላ ይገለፅ / _____/ |
| 212 | የቅድመ ወሊድ ክትትል በምታደርጊበት ወቅት ከእርግዝና ጋር የተያያዙ የጤና ችግር ምልክቶች ተነግሮሽ ነበር? | 3. አዎ<br>4. የለም                                                                                                                |
| 213 | ለጥያቄ ቁ 212 መልስሽአዎ ከሆነ፣ከሚከተሉት የትኛው ተነገረሽ? (ከአንድ በላይ መልስ ይቻላል)        | 7. የብልት መድማት<br>8. የብልት ፈሳሽ<br>9. ከባድ የራስ ምታት<br>10. የእይታ ብኝታ<br>11. ትኩሳት<br>12. የሆድ ህመም<br>9. ሌላ ይገለፅ / _____/                |
| 214 | ከእርግዝና ጋር የተያያዙ የጤና ችግሮች አጋጥሞሽ ነበር?                                 | 1. አዎ<br>2. የለም                                                                                                                |

|     |                                                                                |                                                                                                              |
|-----|--------------------------------------------------------------------------------|--------------------------------------------------------------------------------------------------------------|
| 215 | ለጥያቄ ቁ 214 መልስሽ አዎ ከሆነ ከላይ ከተዘረዘሩት በአንድ ላይ የተከሰቱት የትኞቹ ናቸው?(ከአንድ በላይ መልስ ይቻላል) | 1. የብልት መድማት<br>2. የብልት ፈሳሽ<br>3. ከባድ የራስ ምታት<br>4. የእይታ ብኝታ<br>5. ትኩሳት<br>6. የሆድ ህመም<br>9. ሌላ ይገለፅ / _____/ |
| 216 | በእርግዝና ወቅት ጸረ-ትላትል መድሃኒት ወስደሽ ታወቁያለሽ?                                          | 4. አዎ<br>5. አልወሰድኩም<br>6. አላስታወስም                                                                            |
| 217 | ጽንሰ አቋርጠሽ ወይም ወርጃ አካሂደሽ ታወቁያለሽ?                                                | 1. አዎ<br>2. የለም <del>ጥያቄ ቁ 220 ይለፉ</del>                                                                     |
| 218 | ለጥያቄ ቁ 217 መልስሽ አዎ ከሆነ ለምን ያህል ጊዜ                                              | / _____/ ጊዜ                                                                                                  |
| 219 | የወርጃዉ ዓይነት ምን ነበር?                                                             | 1. በራሱ ጊዜ<br>2. በማኅሳሳት/ሆንተብሎ                                                                                 |
| 220 | ጽንሱን ያቋረጥሽ/ያስወረድሽ በማን ነበር?                                                     | 1. በራሴ/በዘመድ/በጓደኛ<br>2. በልምድ አዋላጅ<br>3. በሰለጠነ የልምድ አዋላጅ<br>4. በጤና ባለሙያ                                        |
| 221 | ጫት ቅመሽ ታወቁያለሽ?                                                                 | 1. አዎ 2. የለም <del>ጥያቄ ቁ 224 ይለፉ</del>                                                                        |
| 222 | ለጥያቄ ቁ 221 መልስሽ አዎ ከሆነ ባለፉት 12 ወራት ውስጥ ቅመሽ ታወቁያለሽ?                             | 1. አዎ<br>2. የለም                                                                                              |
| 223 | ለጥያቄ ቁ 221 መልስሽ አዎ ከሆነ ለምን ያህል ጊዜ ትቆሚያለሽ?                                      | / _____/ በቀን<br>/ _____/ በሳምንት<br>/ _____/ በወር                                                               |
| 224 | ሲጋራ አጭሰሽ ታወቁያለሽ?                                                               | 1. አዎ<br>2. የለም <del>ጥያቄ ቁ 227 ይለፉ</del>                                                                     |
| 225 | ለጥያቄ ቁ 224 መልስሽ አዎ ከሆነ ባለፉት 12 ወራት ውስጥ አጭሰሽ ታወቁያለሽ?                            | 1. አዎ<br>2. የለም                                                                                              |
| 226 | ለጥያቄ ቁ 224 መልስሽ አዎ ከሆነ በቀን ስንት ሲጋራ ታጨሻለሽ?                                      | በቀን/ _____/ ሲጋራ                                                                                              |
| 227 | የአልኮል መጠጥ ጠጥተሽ ታወቁያለሽ?                                                         | 1. አዎ<br>2. የለም <del>ጥያቄ ቁ 228 ይለፉ</del>                                                                     |
| 228 | ለጥያቄ ቁ 227 መልስሽ አዎ ከሆነ ባለፉት 12 ወራት ውስጥ ጠጥተሽ ታወቁያለሽ?                            | 1. አዎ<br>2. የለም                                                                                              |
| 229 | ለጥያቄ ቁ 227 መልስሽ አዎ ከሆነ የጠጣሽዉ የአልኮል ዓይነት?( ከአንድ በላይ ምላሽ ይቻላል)                   | 1. ጠላ<br>2. ጠጅ<br>3. አረቄ<br>4. ቢራ/ድራፍት<br>5. ወይን<br>6. ውስኪ<br>9. ሌላ (ይጠቀስ) _____                             |

### ክፍል ሦስት : የታዊ ጥቃትን በተመለከተ

- |     |                                            |                  |
|-----|--------------------------------------------|------------------|
| 301 | ባለፉት 12 ወራት ውስጥ የታዊ ግንኙነት ነበረሽ?            | 3. አዎ 2. አልነበረኝም |
| 302 | በግንኙነቱ ለምን ያህል ጊዜ ቆየችሁ?                    | / _____/ ወራት     |
| 303 | ባሁኑ ወቅት የታዊ ግንኙነት አለሽ?                     | 3. አዎ 2. የለኝም    |
| 304 | በዚህ ግንኙነት ደስተኛ ነሽ?                         | 1. አዎ 2. አይደለሁም  |
| 305 | ግንኙነት አቁማችሁ ከሆነ፣ካቆማችሁ ምን ያህል ጊዜ ሆናችሁ?      | / _____/ ወራት     |
| 306 | ግንኙነት አቁማችሁ ከሆነ ግንኙነቱ የተቋረጠዉ ባንች ስምምነት ነዉ? | 1. አዎ            |

- 307 ባለፉት 12 ወራት ውስጥ መንገድ ላይ ወይም በትራንስፖርት ቦታዎች ላይ በባለቤት/ጓደኛዎች ተሰድበዋል ታወቁልላቸው?
- 308 መልስዎን አዎ ከሆነለን ያህል ጊዜ?
- 309 በጨባጭ በብድር ወይም በሌላ የጦር መሳሪያ ሊገድልዎ ሞክሮዎ ያለዎት አስፈራርቶቸው ነበር?
- 310 መልስዎን አዎ ከሆነለን ያህል ጊዜ?
- 311 ከፍላጎትዎ ውጭ የግብረ-ሰጋ ግንኙነት እንድትፈፀሟል አስገድዶብዎት ያወቃል?
- 312 መልስዎን አዎ ከሆነለን ያህል ጊዜ?
- 313 ከቤተሰብ ወይም ጎደኞች ጋር ያለሽን ግንኙነት እንድትገድቡ አስገድዶብዎት ያወቃል?
- 314 መልስዎን አዎ ከሆነለን ያህል ጊዜ?
- 315 የምትሰራውን ወይም የምትናገራውን የማጣጣል ወይም የመተቸት ባህሪ ነበረዎት?
- 316 መልስዎን አዎ ከሆነለን ያህል ጊዜ?
- 317 ካንቺ ጋር ንግግር ወይም ወይም አቋም ነበር?
- 318 መልስዎን አዎ ከሆነለን ያህል ጊዜ?
- 319 ወርወሮብዎት ወይም እጅሽን ጠምዝዞብዎት ያወቃል?
- 320 መልስዎን አዎ ከሆነለን ያህል ጊዜ?
- 321 ቆንጥጦሽ፣ባህር ወይም ፀጉርሽን አለዎት ያወቃል?
- 322 መልስዎን አዎ ከሆነለን ያህል ጊዜ?
- 323 በጥፈታ በባለቤት/ጓደኛዎች ወይም በሌላ ሊጎዳዎ በሚችል ነገር መቶሽ ያወቃል?
- 324 መልስዎን አዎ ከሆነለን ያህል ጊዜ?
- 325 ወደ ቤትሽ እንዳትገቡ፣ ከቤት ውስጥ ወይም ውጭ እያለሽ ዘግቶብዎት ወይም ከመኪና አስወርዶ መንገድ ላይ ትቶሽ ሂዶ ያወቃል?
2. አይደለም
4. አዎ
5. ተሰድቤ አላወቅም
6. አላስታውስም
- / \_\_\_\_\_ / ጊዜ
4. አዎ
5. የለም
6. አላስታውስም
- / \_\_\_\_\_ / ጊዜ
1. አዎ
2. አይደለም
3. አላስታውስም
- / \_\_\_\_\_ / ጊዜ
1. አዎ
2. አይደለም
3. አላስታውስም
- / \_\_\_\_\_ / ጊዜ
3. አዎ
4. አልነበረዎትም
5. አላስታውስም
- / \_\_\_\_\_ / ጊዜ
1. አዎ
2. አልነበረዎትም
3. አላስታውስም
- / \_\_\_\_\_ / ጊዜ
3. አዎ
4. አይደለም
5. አላስታውስም
- / \_\_\_\_\_ / ጊዜ
1. አዎ
2. አይደለም
3. አላስታውስም
- / \_\_\_\_\_ / ጊዜ
1. አዎ
2. የለም
3. አላስታውስም
- / \_\_\_\_\_ / ጊዜ
1. አዎ
2. የለም
3. አላስታውስም

**ክፍል አራት: የአካባቢያዊ የጤና ሁኔታ**

|     |                                                           |                                                                                                                                                                                                                                            |
|-----|-----------------------------------------------------------|--------------------------------------------------------------------------------------------------------------------------------------------------------------------------------------------------------------------------------------------|
| 401 | ለመጠጥነት የምትጠቀሙት የወኃ ምንጮችሁ ምንድን ነው ?                        | 1. በመኖሪያ ግቢያችን ካለ ቧንቧ<br>2. ከህዝብ የቧንቧ ወኃ/ቦኖ<br>3. የዝናብ ወኃ<br>4. ከተጠበቀ የምንጭ ወኃ የጥልቅ ጉድጉድ<br>5. ከታጠረ/ከተጠበቀ የኩሬ ወኃ<br>6. ካልታጠረ/ካልተጠበቀ የጥልቅ ጉድጉድ ወኃ<br>7. ካልታጠረ/ካልተጠበቀ የኩሬ ወኃ<br>8. ከወራጅ ወንዝ<br>10. ከዘመናዊ የጥልቅ ጉድጉድ ወኃ<br>9. ሌላ (ይጠቀስ)/ _____/ |
| 402 | አማካይ የቤተሰብ የወኃ ፍጆታ በቀን ምን ያህል ይሆናል?                       | _____ (በሊትር)                                                                                                                                                                                                                               |
| 403 | ከቤታችሁ ወኃ እስከምትቀዱበት ድረስ ምን ያህል ጊዜ ይወስዳል? (የመጠበቂያ ጊዜውን ጨምሮ) | 1. _____ (በደቂቃ)<br>2. አላወቀውም                                                                                                                                                                                                               |
| 404 | ለወኃ ማጠራቀሚያነት የምትጠቀሙት ምንድን ነው?                             | 1. የሚከደኑ ማጠራቀሚያዎችን<br>2. ክፍት ማጠራቀሚያዎችን<br>3. እንገተ ጠባብ ማጠራቀሚያዎችን<br>9. ሌላ (ይጠቀስ) / _____/                                                                                                                                                   |
| 405 | ወኃ ከማጠራቀሚያዊ የምትቀዱት እንዴት ነው?                               | 3. በማፍሰስ<br>4. በመጥለቅ<br>9. ሌላ (ይጠቀስ)/ _____/                                                                                                                                                                                               |
| 406 | የመጠጥ ወኃን ጤናማ ለማድረግ ወኃን የምታከሙበት ዘዴ አላችሁ?                   | 2. አዎ<br>3. የለም                                                                                                                                                                                                                            |
| 407 | ለጥያቄ ቁ 406 መልስሽ አዎ ከሆነ የትኞቹን ዘዴዎች ትጠቀማላችሁ?                | 7. ማፍላት<br>8. በኬሚካል ማከም<br>9. በጨርቅ በማጣራት<br>10. በአሽዋ፤ጠጠር/ሽክላ በማጣራት<br>11. በጽጋይ ብርሃን በማከም<br>12. በማጥለል<br>9. ሌላ (ይጠቀስ)/ _____/                                                                                                              |
| 408 | የመጠጥ ወኃ እንዴት ጤናማ እንደሚደረግ በጤና ባለሙያ ትምህርት ተሰጥቶአችሁ ያወቃል?     | 3. አዎ<br>4. የለም                                                                                                                                                                                                                            |
| 409 | እጅን በሳሙና ወይም በአመድ የመታጠብን ጥቅም ከጤና ባለሙያ ምክር አግኝታችሁ ታወቃላችሁ?  | 3. አዎ<br>4. የለም                                                                                                                                                                                                                            |
| 410 | ሽንት ቤት አላችሁ?                                              | 1. አዎ 2. የለም                                                                                                                                                                                                                               |
| 411 | ለጥያቄ ቁ 410 መልስሽ አዎ ከሆነ፤ምን ዓይነት ነው?                        | 8. የግል ክፍት ጉድገድ<br>9. የግል ባለእንጨት መረባረብ<br>10. የግል ከሲሚንቶ የተሠራ<br>11. የግል የተሻሻለ ባለማናፈሻ<br>12. የጋራ ባለእንጨት መረባረብ<br>13. የጋራ የተሻሻለ ባለማናፈሻ<br>9. ሌላ (ይጠቀስ) _____                                                                                 |
| 412 | ለጥያቄ ቁ 410 መልስሽ የለም ከሆነ፤የቤተሰቡ አባላት የሚጸዱዱት የት ነው?          | 3. በተከለለ ቦታ<br>4. ሜዳ ላይ<br>9. ሌላ (ይጠቀስ) _____                                                                                                                                                                                              |
| 413 | ሽንት ቤት መጠቀም የማይችሉ ህጻናት ከተጸዱዱ በኋላ ሰገራቸውን ምን ታደርጉታላችሁ ?     | 5. ወደ ሽንት ቤት ይጣላል/ይወረወራል<br>6. ከግቢ ውጭ ይጣላል/ይወረወራል<br>7. ግቢ ውስጥ ይቀበራል<br>8. በተጸዱዱበት ቦታ ይተዋል/ይቀራል                                                                                                                                            |

|     |                                                |                                                                                                                                             |
|-----|------------------------------------------------|---------------------------------------------------------------------------------------------------------------------------------------------|
|     |                                                | 9. ሌላ (ይጠቀስ) _____                                                                                                                          |
| 414 | የቤተሰቡ አባላት ደረቅ ቆሻሻን የሚያስወግደው የት ነው?            | 1. የግል ደረቅ ቆሻሻ ማጠራቀሚያ<br>2. የጋራ ደረቅ ቆሻሻ ማጠራቀሚያ<br>3. ለፍግነት/ማዳበሪያነት ይወላል<br>4. መቅበር/ማቃጠል<br>5. ሜዳ ላይ<br>6. በተደራጁ ማህበራት<br>9. ሌላ (ይጠቀስ) _____ |
| 415 | በአብዛኛው እጅሽን የምትታጠቢው መቼ ነው? (ከአንድ በላይ ምላሽ ይቻላል) | 1. ከሽንት ቤት መልስ<br>2. ከምግብ ዝግጅት በፊት<br>3. ከምግብ ከማቅረብ በፊት<br>4. ከመመገብ በፊት<br>5. ከመመገብ በኋላ<br>6. ህጻናትን ካጸዳዳሁ በኋላ<br>9. ሌላ (ይጠቀስ) _____         |
| 416 | እጅሽን የምትታጠቢው በምንድን ነው?                         | 1. በውኃ ብቻ<br>2. በውኃ እና በሳሙና<br>3. በውኃ እና በአመድ<br>9. ሌላ (ይጠቀስ) _____                                                                         |
| 417 | የምትኖሩበት ቤት ስንት ክፍሎች አሉት? (እቃቤትና ኩሽና ሳይጨምር)     | _____ (በቁጥር)                                                                                                                                |
| 418 | የምትኖሩበት ቤት መስኮት አለው?                           | 1. አዎ      2. የለም                                                                                                                           |
| 419 | ለጥያቄ ቁ 418 መልስሽ አዎ ከሆነ የመስኮቶች ሁኔታ?             | 1. እንከፍተዋለን    2. እንከፍተዋልም                                                                                                                  |
| 420 | ለኩሽናነት የሚያገለግል የተለየ ክፍል አላችሁ?                  | 1. አዎ      2. የለም                                                                                                                           |
| 421 | ለእንስሳት መኖሪያነት የሚያገለግል የተለየ ክፍል አላችሁ?           | 1. አዎ      2. የለም                                                                                                                           |
| 422 | በአብዛኛው ለምግብ ማብሰያነት የምትጠቀሙት ምንድን ነው?            | 1. እንጨት<br>2. ጋዝ<br>3. ኤሌክትሪክ<br>4. ኩብት<br>9. ሌላ (ይጠቀስ) _____                                                                               |

የጠያቂው ስም \_\_\_\_\_

ቃለ መጠይቁ የተደረገበት ቀን \_\_\_\_\_ / \_\_\_\_\_ / 2005 ፊርማ \_\_\_\_\_

የተቆጣጣሪው ስም \_\_\_\_\_ / ፊርማ \_\_\_\_\_

- የመጠይቁ መለያ ቁጥር \_\_\_\_\_
- የሆስፒታሉ ስም \_\_\_\_\_
- መጠይቁ የተደረገበት ሰዓት \_\_\_\_\_
